# Supplementary material
Source: PubMed Central journal article supplement (PMC5570439)
Supplement: NIHMS893063-supplement-Table_S9_pdf.pdf [file NIHMS893063-supplement-Table_S9_pdf.pdf]

**Table S9:** Outline of bioinformatic analysis procedures

| Analysis Steps                                                                                                                                                                                | Corresponding Script / Software                                                                                                                                | Options, parameters                                                                                                                                   |
|-----------------------------------------------------------------------------------------------------------------------------------------------------------------------------------------------|----------------------------------------------------------------------------------------------------------------------------------------------------------------|-------------------------------------------------------------------------------------------------------------------------------------------------------|
| <b>Mapping and Preprocessing</b>                                                                                                                                                              |                                                                                                                                                                |                                                                                                                                                       |
| 1. Trim adapters. For multiplexed reads, 16 bp were further trimmed from both 5'- and 3'- ends of R1 and R2 reads to remove random primer index sequence and C/T tail introduced by Adaptase. | Cutadapt (27) ( <a href="http://cutadapt.readthedocs.io/en/stable/index.html">http://cutadapt.readthedocs.io/en/stable/index.html</a> )                        | paired-end mode: -f fastq -q 20 -m 62 -a AGATCGGAAGAGCACACGTCTGAAC -A AGATCGGAAGAGCGTCGTGTAGGGA<br><br>Multiplexed reads: -f fastq -u 16 -u -16 -m 30 |
| 2. Map data to reference genome (mm10/hg19). R1 and R2 reads were mapped separately as single-end reads.                                                                                      | Bismark v0.15.0 (28) ( <a href="https://www.bioinformatics.babraham.ac.uk/projects/bismark/">https://www.bioinformatics.babraham.ac.uk/projects/bismark/</a> ) | Both reads: --bowtie2<br>R1 only: --pbat                                                                                                              |
| 3. Remove duplicate reads.                                                                                                                                                                    | Picard 1.141 ( <a href="https://broadinstitute.github.io/picard/">https://broadinstitute.github.io/picard/</a> )                                               | MarkDuplicates with the option REMOVE_DUPLICATES=true                                                                                                 |
| 4. Remove low quality (MAPQ<30) reads (Samtools, 29)                                                                                                                                          | single_cell_filter.pl                                                                                                                                          |                                                                                                                                                       |
| 5. Remove highly methylated read (mCH > 70%) to protect against reads that failed bisulfite conversion                                                                                        |                                                                                                                                                                |                                                                                                                                                       |
| 6. Generate cytosines summary tables (allc tables)                                                                                                                                            | Methylpy (5, 7, 23)                                                                                                                                            | call_methylated_sites                                                                                                                                 |
| <b>Quality Control</b>                                                                                                                                                                        |                                                                                                                                                                |                                                                                                                                                       |
| 1. Remove cells with high non-conversion rate estimated using mCCC (>1% in mouse and >2% in human)                                                                                            | See Tables S1 and S2                                                                                                                                           |                                                                                                                                                       |
| 2. Exclude cells with low number of                                                                                                                                                           |                                                                                                                                                                |                                                                                                                                                       |

|                                                                                                                       |                                                                 |
|-----------------------------------------------------------------------------------------------------------------------|-----------------------------------------------------------------|
| nonclonal mapped reads (<400K in mouse and <500K in human)                                                            |                                                                 |
| 3. Remove cells with coverage at >15% of genomic cytosines to protect against samples potentially with multiple cells |                                                                 |
| 4. Exclude cells with <99% of SNPs in cell reads matched genotype of human subject and thus may be contaminated       |                                                                 |
| <b>Data Processing</b>                                                                                                |                                                                 |
| 1. Compute mCH level in non-overlapping 100 KB bins.                                                                  | bin_allc_files.py                                               |
| 2. Keep bins with high coverage (>100 base calls) in ≥99.5% of samples.                                               |                                                                 |
| 3. Impute mCH in cells with low coverage (<100 base calls) using the mean across all cells for that bin.              |                                                                 |
| 4. Compute %mCH for each bin:<br>methylated_base_calls / total_base_calls.                                            | preproc_and_TSNE.py<br>Help: python3 preproc_and_TSNE.py --help |
| 5. Normalize each bin in a cell by dividing by the global mCH in that cell.                                           |                                                                 |
| <b>Cluster Cells using BackSPIN Algorithm</b>                                                                         |                                                                 |
| DO {                                                                                                                  |                                                                 |
| 1. Select the top 2000 bins with greatest variance across cells.                                                      |                                                                 |
| 2. Order the cells in 1D based on similarity using the SPIN algorithm.                                                | backSPIN.py<br>Help: python3 backSPIN.py --help                 |
| 3. Split cluster into two clusters at the optimal cut-point (where the                                                |                                                                 |

|                                                                                                                                                                                    |                                                                                                                                                                  |         |
|------------------------------------------------------------------------------------------------------------------------------------------------------------------------------------|------------------------------------------------------------------------------------------------------------------------------------------------------------------|---------|
| average correlation within the two new clusters was highest).                                                                                                                      |                                                                                                                                                                  |         |
| 4. Retain split if at least one of new subclusters has >15% increase in the average correlation value over the average of all cells in the original cluster; otherwise, terminate. |                                                                                                                                                                  |         |
| } (for each new cluster, repeat if cluster size >50 cells)                                                                                                                         |                                                                                                                                                                  |         |
| 5. Merge clusters with <7 marker genes between them.                                                                                                                               | See methods                                                                                                                                                      |         |
| <b>Call CG DMRs</b>                                                                                                                                                                |                                                                                                                                                                  |         |
| 1. Call mCG differentially methylated regions (FDR < 0.01).                                                                                                                        | Methylpy                                                                                                                                                         | DMRfind |
| <b>Data Visualization</b>                                                                                                                                                          |                                                                                                                                                                  |         |
| 1. Retain top 50 principal components from PCA and run TSNE to reduce cells to 2D space.                                                                                           | <pre>preproc_and_TSNE.py Help: python3 preproc_and_TSNE.py --help</pre>                                                                                          |         |
| 2. Load DNA methylation tracks into AnnoJ browser (http://brainome.ucsd.edu/single_neurons)                                                                                        | <a href="http://brainome.ucsd.edu/howto_annoj.html">http://brainome.ucsd.edu/howto_annoj.html</a><br><br><a href="http://www.annoj.org">http://www.annoj.org</a> |         |
